# 1 Protective Population Behavior Change in Outbreaks of Emerging Infectious Disease

2  
3 Evans K. Lodge<sup>1,2</sup>, Annakate M. Schatz<sup>3</sup>, John M. Drake<sup>3</sup>

4  
5 <sup>1</sup>Department of Epidemiology, Gillings School of Global Public Health, University of North  
6 Carolina at Chapel Hill, Chapel Hill, North Carolina, United States

7 <sup>2</sup>School of Medicine, University of North Carolina at Chapel Hill, Chapel Hill, North Carolina,  
8 United States

9 <sup>3</sup>Odum School of Ecology and Center for Ecology of Infectious Diseases, University of Georgia,  
10 Athens, Georgia, United States

## 11 **ABSTRACT:**

12 During outbreaks of emerging infections, the lack of effective drugs and vaccines increases  
13 reliance on non-pharmacologic public health interventions and behavior change to limit human-  
14 to-human transmission. Interventions that increase the speed with which infected individuals  
15 remove themselves from the susceptible population are paramount, particularly isolation and  
16 hospitalization. Ebola virus disease (EVD), Severe Acute Respiratory Syndrome (SARS), and  
17 Middle East Respiratory Syndrome (MERS) are zoonotic viruses that have caused significant  
18 recent outbreaks with sustained human-to-human transmission. This investigation quantified  
19 changing mean removal rates (MRR) and days from symptom onset to hospitalization (DSOH) of  
20 infected individuals from the population in seven different outbreaks of EVD, SARS, and MERS,  
21 to test for statistically significant differences in these metrics between outbreaks. We found  
22 that epidemic week and viral serial interval were correlated with the speed with which  
23 populations developed and maintained health behaviors in each outbreak.  
24

## 25 **KEYWORDS:**

26 Ebola, MERS, SARS, outbreak, public health, behavior change  
27  
28

## 29 **INTRODUCTION:**

30 One of the most important factors in assessing the danger posed by an epidemic of infectious  
31 disease is pathogen transmissibility. Widespread public anxiety during the 2013-2016 West  
32 African Ebola epidemic, while driven by an extremely high fatality rate during the early stages,  
33 was fueled in part by the speed with which Ebola Virus Disease (EVD) spread throughout the  
34 populations of Liberia, Sierra Leone, and Guinea.<sup>1-3</sup> Similarly, concerns over annual influenza  
35 epidemics in the United States center on densely inhabited areas with multiple opportunities  
36 for viral transmission due to physical proximity between susceptible individuals.<sup>4</sup> Regardless of  
37 geographic setting, understanding how to slow and control pathogen dissemination is a high  
38 priority in forecasting and preventing epidemics of infectious disease.  
39

40 Epidemic modelers frequently employ compartmental models of disease outbreaks, such as  
41 Susceptible-Infected-Recovered (SIR) models as in Keeling and Rohani,<sup>5</sup> Susceptible-Infected-  
42 Susceptible (SIS) models as in Gray *et al*,<sup>6</sup> and Susceptible-Exposed-Infected-Recovered (SEIR)  
43 models as in LeGrand *et al*.<sup>7</sup> Accurately estimating and modeling the number of infected and  
44 susceptible individuals in at-risk populations is of crucial importance in these models. Such

45 estimation is complicated, however, by efforts to isolate infected individuals in hospitals or  
46 other settings to decrease contact with the susceptible population. While the isolation of  
47 infected individuals is beneficial and should be encouraged, it challenges data analysts because  
48 it is time-varying and reflects dynamic and often unpredictable human behavior. Moreover, the  
49 rate at which infected individuals are removed from the population typically accelerates  
50 throughout an epidemic as awareness of the infectious threat increases,<sup>8</sup> a process Drake *et al*  
51 referred to as “societal learning.”<sup>9</sup> Obtaining accurate estimates of this time-varying removal of  
52 infected persons, while difficult, improves the quality of compartmental models for epidemics  
53 of infectious disease.<sup>9,10</sup> To our knowledge, however, no work has directly compared the rate of  
54 behavioral adaptation across multiple epidemics, societies, and geographic settings.

55  
56 Many factors can affect how quickly effective isolation practices are implemented, such as  
57 access to health care, local public health funding, international aid, and the efficacy of  
58 information campaigns.<sup>11</sup> Local health care practices and non-formal healthcare systems also  
59 provide care to patients during epidemics and can play a part in quarantining infected  
60 individuals.<sup>12</sup> Previous work in Liberia has shown that a combination of these approaches  
61 through simultaneous community engagement and clinical intervention is more effective than  
62 any single intervention, with both health care access and utilization increasing hand-in-hand to  
63 decrease EVD transmission during the 2013-2016 Ebola epidemic.<sup>13</sup> While infection prevention  
64 often includes vaccination, progress to develop effective vaccines for emerging infections is  
65 slow and not necessarily more effective than isolation of infected individuals.<sup>14</sup> Ring vaccination  
66 with the rVSV-ZEBOV-GP Ebola vaccine<sup>15</sup> in the Democratic Republic of the Congo is  
67 promising,<sup>16</sup> but previous work has suggested that ring vaccination may only provide a marginal  
68 benefit to rigorous contact tracing and patient isolation.<sup>17</sup>

69  
70 The focus of this paper is the identification of key similarities and differences in the behavioral  
71 response to outbreaks of three emerging zoonotic infections. We sought to determine how the  
72 mean removal rate of infected individuals changed over the course of each outbreak as  
73 measured by epidemic week and viral serial interval. Individuals often experience zoonotic and  
74 emerging infections as innately more frightening than “familiar” diseases, leading to rapid  
75 behavioral adaptations due to high perceived risk.<sup>18</sup> Behavior modification, while crucial for  
76 epidemic containment,<sup>19-21</sup> is context dependent and difficult to predict due to social network,  
77 socioeconomic, and behavioral differences between populations.<sup>22</sup> Thus, we chose seven  
78 different outbreaks of disease that stoked significant local and international fear due to the risk  
79 of global pandemic: the 2013-2016 Liberian Ebola epidemic, subsets of the 2013-2016 Liberian  
80 outbreak from Lofa and Montserrado Counties,<sup>23</sup> the 2003 Hong Kong SARS epidemic,<sup>24-26</sup> the  
81 2014 Saudi Arabia MERS outbreaks in Riyadh and Jeddah,<sup>27</sup> and the 2015 South Korea MERS  
82 outbreak.<sup>28</sup> We examined whether epidemic week and serial interval successfully predicted  
83 days from disease onset to hospitalization (DSOH) and mean removal rate (MRR) throughout  
84 each epidemic.

## 85 86 **MATERIALS AND METHODS:**

### 87 **DATA:**

88 We obtained patient-level data for Ebola and MERS, and daily aggregated data for SARS. We  
89 added new columns to each epidemic dataset to track the number of days from symptom onset  
90 to hospitalization (calculated as hospitalization date - date of symptom onset; abbreviated  
91 DSOH) and the mean removal rate (calculated as  $1 / \text{DSOH}$ ; abbreviated MRR). In calculating  
92 MRR, we considered only positive DSOH values in order to focus on community transmission  
93 rather than nosocomial transmission. Additionally, we converted symptom onset dates to  
94 weekly onset dates by replacing each date with that of the closest previous Sunday.

95

#### 96 **BINNED DATA:**

97 We compiled data for each outbreak location binned by epidemic week, to produce comparable  
98 data for regression analysis. Epidemic weeks came from weekly onset dates described above.  
99 We also binned the same data by serial interval, using 12 days as the estimated serial interval  
100 for Ebola,<sup>23</sup> 8 days for SARS,<sup>24</sup> and 7 days for MERS;<sup>27</sup> this was calculated as epidemic  
101 week/(serial interval/7). Each dataset included, per week, the number of new cases, the  
102 cumulative number of cases, mean DSOH and associated standard deviation, and MRR and  
103 associated standard deviation. We removed epidemic weeks from the beginning of each  
104 outbreak so that the first three epidemic weeks had greater than 0 cases of disease each in  
105 order to focus on population-level behavioral adaptation to large-scale disease outbreaks  
106 instead of adaptations to individual disease events early in an epidemic. We performed all  
107 regression analyses using this binned data.

108

#### 109 **REGRESSION ANALYSES:**

110 Initial regression analyses fit linear models to predict DSOH and MRR (Table 1, Eqs. 1-2). As  
111 before, data for DSOH excluded negative values (individuals who become symptomatic after  
112 being hospitalized for other reasons) to focus on community disease transmission and behavior  
113 change instead of nosocomial infection.

114

115 Outlying points in  
116 the Liberian Ebola  
117 epidemic skewed  
118 our initial linear  
119 regression models.  
120 We compared  
121 manual removal of  
122 outliers, quantile  
123 regression, and  
124 robust linear  
125 regression to find

| Eq. | Regression Type | Response | Predictor       | Interaction Term  |
|-----|-----------------|----------|-----------------|-------------------|
| 1   | linear          | DSOH     | epidemic week   | none              |
| 2   | linear          | MRR      | epidemic week   | none              |
| 3   | robust linear   | DSOH     | epidemic week   | none              |
| 4   | robust linear   | MRR      | epidemic week   | none              |
| 5   | robust linear   | MRR      | epidemic week   | outbreak location |
| 6   | robust linear   | MRR      | serial interval | outbreak location |

126 **Table 1. Regression equations.**

127 DSOH stands for days from symptom onset to hospitalization; MRR stands for mean removal  
128 rate, calculated as  $(1 / \text{DSOH})$ . Epidemic weeks were weighted by cases per week. Outbreak  
129 location for DSOH and MRR included seven levels (Liberia, Lofa County, Montserrado County,  
130 South Korea, Riyadh, Jeddah, and Hong Kong).

126 the most appropriate method for handling such points. The three methods produced almost  
127 identical results. We used robust regression to re-fit all initial linear regression models to avoid  
128 the influence of outliers (Table 1, Eqs. 3-4). In addition, we performed robust linear regressions  
129 of MRR with an interaction term accounting for outbreak location (Table 1, Eq. 5-6) to examine  
130 predicted mean change in the MRR in each epidemic. We used the Bonferroni correction<sup>29</sup> for  
131 multiple comparisons to compute confidence intervals, utilizing a 99% confidence interval in

132 our model comparisons. The size of the smaller epidemics (MERS and SARS) played a large part  
133 in determining confidence interval size and significance. All data management, modeling, and  
134 visualization was performed in R.<sup>30</sup>

135

## 136 RESULTS:

### 137 **DAYS TO HOSPITALIZATION (DSOH) AND MEAN REMOVAL RATE (MRR):**

138 DSOH consistently declined over time in each epidemic. Robust regressions for DSOH and MRR  
139 (Table 1, Eqs. 3 and 4) showed negative and positive slopes, respectively, which corroborated  
140 the observations made on non-binned data (Fig. 1).

141

142 From robust  
143 regression analyses  
144 accounting for  
145 outbreak location  
146 (Table 1, Eqs. 5 and 6),  
147 we calculated the  
148 mean change in the  
149 MRR for each  
150 outbreak location  
151 using the  
152 *interactionMeans*  
153 function from the R  
154 package *phia* for post-  
155 hoc interaction  
156 analysis. This analysis  
157 showed that the mean  
158 change in the MRR of  
159 the Hong Kong SARS  
160 epidemic was  
161 approximately five  
162 times (per serial  
163 interval) to seven  
164 times (per epidemic  
165 week) more than the  
166 mean change in the  
167 MRR of the Liberian  
168 Ebola epidemic (Fig.  
169 2). The mean change  
170 of the MRR in the  
171 Ebola epidemic in Lofa  
172 County, Liberia, was  
173 significantly higher than the mean change of the MRR for the overall Liberian epidemic and the

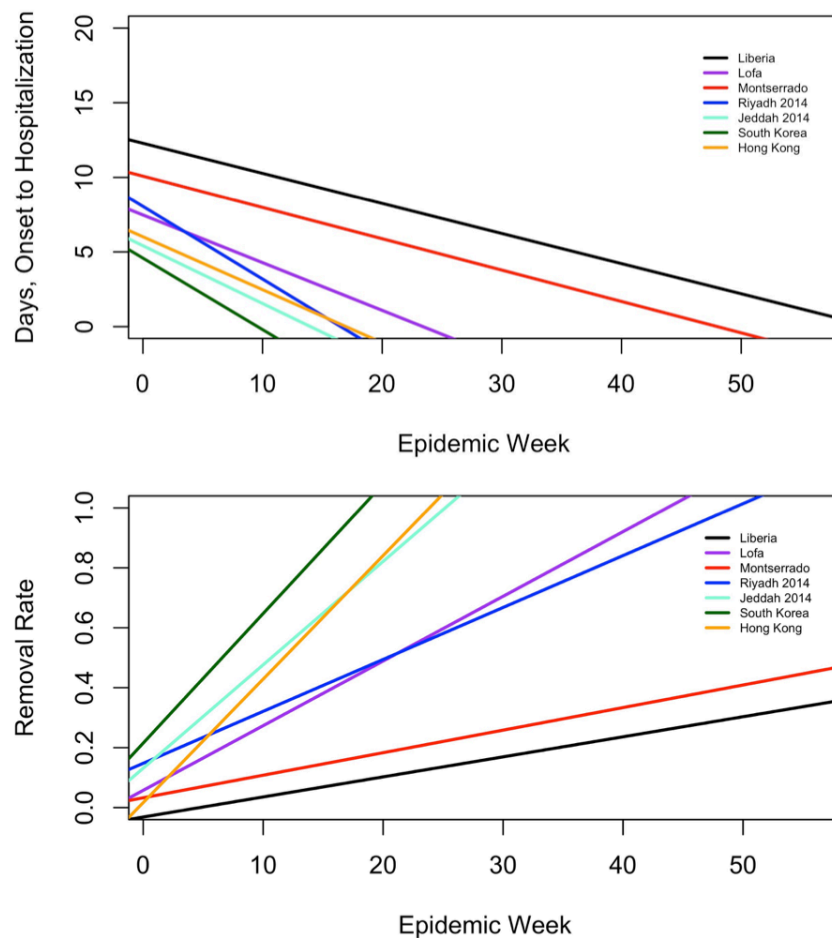

**Figure 1. Regression: DSOH and MRR.**

The public health response to epidemic infection varied widely between the outbreaks studied. These graphs depict model lines from regressions of each of the 2 response variables (DSOH (Table 1, Eq. 4) and MRR (Table 1, Eq. 5)) on epidemic week for the 7 outbreaks indicated in the legend. South Korea and Liberia exhibited the most extreme slopes in both analyses. As an illustration of the observed difference between outbreaks, the graphs show South Korea achieving an almost complete removal of infected individuals from the population and a sharp decline in days till hospitalization within 20 weeks, while Liberia only achieved a roughly 20% removal rate by 50 weeks.

174 outbreak in Montserrado County, Liberia, regardless of predictor (epidemic week or serial  
175 interval) (Fig. 2). The three MERS outbreaks (Riyadh, Jeddah, and South Korea) did not differ  
176 significantly from one another and had limited precision (Fig. 2).

177  
178 We found that  
179 predicting mean  
180 change of the MRR  
181 by epidemic week  
182 (Table 1, Eq. 5) led  
183 to higher mean  
184 estimates and  
185 wider confidence  
186 intervals in the  
187 MERS and SARS  
188 outbreaks;  
189 conversely,  
190 predicting with  
191 serial interval  
192 (Table 1, Eq. 6)  
193 lowered mean  
194 estimates and  
195 narrowed the

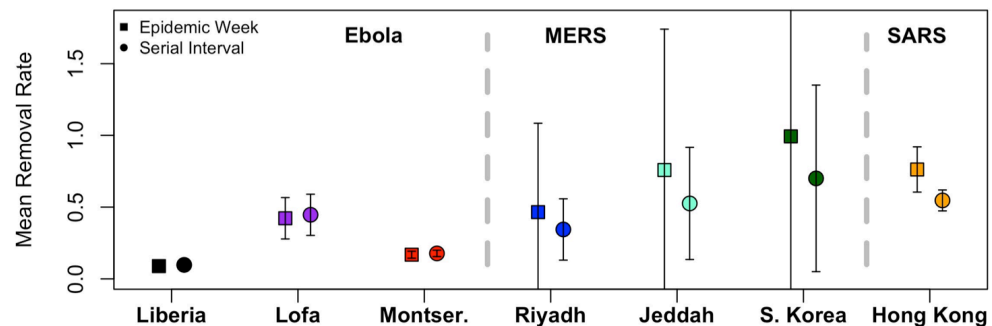

**Figure 2. Adjusted MRR.**

The average change in the mean removal rate (MRR) differed based on the type of outbreak, the location, and the independent variable (epidemic week or serial interval) used to predict changes in MRR. The error bars plotted around the estimated MRR values represent the normalized 99% confidence intervals calculated using the *interactionMeans* function in R. The most precise estimates were observed for the Ebola outbreak, and the largest for the outbreaks of MERS. Predicting the mean change of the MRR with serial interval generally led to tighter confidence intervals than predictions using epidemic week. These results indicate that an outbreak's type and location are important determinants of the mean change in the MRR per epidemic week or serial interval.

196 associated confidence intervals (Fig. 2). We identified little difference in the mean change of  
197 the MRR for the Ebola outbreak depending on predictor (Fig. 2). This indicates that, at least in  
198 the case of MERS and SARS, both the passage of time and the serial interval of each virus may  
199 affect the speed with which populations develop and maintain health behaviors.

200  
201

## 202 DISCUSSION:

203 The primary finding of this study was that removal of infected individuals from the susceptible  
204 population, measured as DSOH and MRR, increases over time and varies significantly based on  
205 outbreak duration and location. While DSOH improved (decreased) in every epidemic over  
206 time, extreme disparities in starting values (approximately 13 days from symptom onset to  
207 hospitalization at the beginning of the 2013-2016 Ebola outbreak in Liberia, versus  
208 approximately 5 days in the 2015 MERS outbreak in South Korea) highlight the intrinsic  
209 disadvantage that low-income countries may experience due to the interrelated concerns of  
210 poverty, limited access to health care, and low investment in public health. DSOH and MRR  
211 regressed against epidemic week differed across all observed outbreaks, and MRR likewise  
212 differed markedly based on the virus in question (Ebola, MERS, or SARS), the location, and at  
213 times both. Both DSOH and MRR are useful measurements of public health behavior during  
214 outbreaks, and are useful tools to compare outbreak response effectiveness in distinct  
215 geographic, economic, and social settings. Of course, DSOH and MRR are intrinsically and simply  
216 related since one is simply the reciprocal of the other. The main advantage of DSOH is that it is

217 expressed in intuitive units (days elapsed), whereas MRR reflects the theoretical “removal rate”  
218 of standard compartmental models.<sup>5</sup>

219

220 Figure 2 highlights differences in mean change of the MRR due to outbreak type (Ebola, MERS,  
221 or SARS) and location. Mean change of the MRR was similar when calculated using epidemic  
222 week versus serial interval for Ebola, but demonstrated a lower estimate and lower standard  
223 error when calculated using serial interval in all three outbreaks of MERS and the outbreak of  
224 SARS in Hong Kong. This suggests that the relevance of various predictors (epidemic week  
225 versus serial interval) may vary based upon the type and location of an outbreak, although the  
226 comparative relevance of epidemic type versus location cannot be disentangled with the data  
227 available in this study. We recommend similar analyses of MRR be conducted across a wide  
228 range of geographies as outbreaks of emerging pathogens arise, providing important data on  
229 the range of MRR, and its expected rate of change, in different settings.

230

231 While our findings demonstrate large and statistically significant differences in MRR, it is  
232 notable that the calculated rates of change in the MRRs are within a factor of ten (when  
233 calculated using epidemic week) to seven (when calculated using serial interval) of each other  
234 (Fig. 2), with the mean change being the lowest in the EVD outbreak in Liberia and the highest  
235 in the MERS outbreak in South Korea. For modelers seeking to understand the epidemiology of  
236 emerging infectious diseases with limited or no data from previous outbreaks, this study  
237 provides a range of acceptable values for the MRR based on seven geographically distinct  
238 outbreaks of three emerging diseases. Similarly, while large disparities in DSOH are obvious (Fig.  
239 1), these data highlight that all societies quickly adapt to outbreaks of emerging infections.  
240 Drake *et al* previously demonstrated the positive impact of behavior change in infectious  
241 outbreaks, noting that doubling the rate of “societal learning” in a model of the 2003 SARS  
242 outbreak in Singapore approximately halved the estimated number of infected patients.<sup>9</sup> While  
243 there is a theoretical upper limit to the speed with which newly-infected individuals can be  
244 removed from the susceptible population,<sup>9</sup> public health strategies aimed at fostering  
245 behavioral adaptations and accelerating isolation should form a cornerstone of interventions  
246 tasked with limiting the spread of highly contagious and deadly emerging pathogens.<sup>31</sup>

247

## 248 **CONCLUSION:**

249 We have shown that public health practices for isolating infected individuals from the  
250 susceptible population vary significantly by pathogen and location, but can in some cases be  
251 predicted by the timing and serial interval of the epidemic. This study detected variation in  
252 DSOH and MRR based on epidemic location and outbreak type, indicating that it may be  
253 possible to estimate a general range of the rate of change in these variables over time. Due to  
254 location-specific differences in DSOH and MRR, modelers who seek to develop forecasts early in  
255 an outbreak would benefit from estimating an expected range for removal of infected  
256 individuals using data from past outbreaks of the same pathogen in a similar setting.  
257 Furthermore, the quality of these estimates will be impacted by the metric chosen, as seen by  
258 the notable, but distinct, trends detected in DSOH and MRR. As seen in this study, utilizing a  
259 well-chosen response variable with a relatively small amount of data can provide material for  
260 making effective forecasts about public health behavior.

261

262 **DATA, CODE, AND MATERIALS:**

263 We studied seven outbreaks: the 2013-2016 Liberian Ebola epidemic on a country-wide level,  
264 subsets of the same epidemic in Lofa and Montserrado Counties, the 2003 Hong Kong SARS  
265 epidemic, the 2014 Saudi Arabia MERS outbreaks in Riyadh and Jeddah, and the 2015 South  
266 Korea MERS outbreak. The Ebola data was originally obtained by the World Health Organization  
267 and provided by Christopher Dye (dyec@who.int). The Hong Kong SARS data was provided by  
268 Gabriel Leung (gmleung@hku.hk) of Hong Kong University. Please contact Christopher and  
269 Gabriel for data regarding Ebola and SARS, respectively, due to concerns regarding potentially  
270 identifiable health information. Finally, the MERS data for Saudi Arabia and South Korea were  
271 obtained from data compiled by Andrew Rambaut (a.rambaut@ed.ac.uk) of the University of  
272 Edinburgh, and is publicly available at [https://github.com/rambaut/MERS-Cases/blob/gh-](https://github.com/rambaut/MERS-Cases/blob/gh-pages/data/cases.csv)  
273 [pages/data/cases.csv](https://github.com/rambaut/MERS-Cases/blob/gh-pages/data/cases.csv).

274

275 **COMPETING INTERESTS:**

276 We have no competing interests.

277

278 **AUTHOR'S CONTRIBUTIONS:**

279 Evans Lodge helped develop the project and conduct initial data analysis with John Drake as  
280 part of the University of Georgia Population Biology of Infectious Diseases REU Site. Annakate  
281 Schatz updated Lodge's analyses with finalized Ebola data and wrote an initial paper draft from  
282 that work. Lodge and Drake finalized the manuscript for submission.

283

284 **FUNDING:**

285 This work was performed as part of the Population Biology of Infectious Diseases REU Site  
286 Program. Funding was provided by grants from the National Science Foundation (DBI-1156707)  
287 and the National Institute of General Medical Sciences of the National Institutes of Health  
288 under Award Number U01GM110744. The content is solely the responsibility of the authors  
289 and does not necessarily reflect the official views of the National Science Foundation or the  
290 National Institutes of Health.

291

292 **REFERENCES:**

293

- 294 1. WHO Ebola Response Team. Ebola Virus Disease in West Africa — The First 9 Months of the  
295 Epidemic and Forward Projections. *N Engl J Med* **371**, 1481–1495 (2014).
- 296 2. Garske, T. *et al.* Heterogeneities in the case fatality ratio in the West African Ebola outbreak  
297 2013–2016. *Philosophical Transactions of the Royal Society B: Biological Sciences* **372**,  
298 20160308 (2017).
- 299 3. WHO Ebola Response Team. West African Ebola Epidemic after One Year — Slowing but Not  
300 Yet under Control. *N Engl J Med* **372**, 584–587 (2015).
- 301 4. Dalziel, B. D. *et al.* Urbanization and humidity shape the intensity of influenza epidemics in  
302 U.S. cities. *Science* **362**, 75–79 (2018).
- 303 5. Matt J. Keeling & Pejman Rohani. *Modeling Infectious Diseases in Humans and Animals*.  
304 (Princeton University Press, 2011).

- 305 6. Gray, A., Greenhalgh, D., Hu, L., Mao, X. & Pan, J. A Stochastic Differential Equation SIS  
306 Epidemic Model. *SIAM J. Appl. Math.* **71**, 876–902 (2011).
- 307 7. Legrand, J., Grais, R. F., Boelle, P. Y., Valleron, A. J. & Flahault, A. Understanding the dynamics  
308 of Ebola epidemics. *Epidemiology & Infection* **135**, 610–621 (2007).
- 309 8. Brug, J., Aro, A. R. & Richardus, J. H. Risk Perceptions and Behaviour: Towards Pandemic  
310 Control of Emerging Infectious Diseases. *Int.J. Behav. Med.* **16**, 3–6 (2009).
- 311 9. Drake, J. M., Chew, S. K. & Ma, S. Societal Learning in Epidemics: Intervention Effectiveness  
312 during the 2003 SARS Outbreak in Singapore. *PLoS ONE* **1**, e20 (2006).
- 313 10. MAL Hayashi. Integrating Mathematical Models of Behavior and Infectious Disease:  
314 Applications to Outbreak Dynamics and Control. (2016).
- 315 11. Freimuth, V., Linnan, H. W. & Potter, P. Communicating the threat of emerging infections to  
316 the public. *Emerg Infect Dis* **6**, 337–347 (2000).
- 317 12. McLean, K. E. *et al.* Community-based reports of morbidity, mortality, and health-seeking  
318 behaviours in four Monrovia communities during the West African Ebola epidemic. *Global*  
319 *Public Health* **13**, 528–544 (2018).
- 320 13. Funk Sebastian *et al.* The impact of control strategies and behavioural changes on the  
321 elimination of Ebola from Lofa County, Liberia. *Philosophical Transactions of the Royal*  
322 *Society B: Biological Sciences* **372**, 20160302 (2017).
- 323 14. Dimitri, N. The Economics of Epidemic Diseases. *PLoS ONE* **10**, e0137964 (2015).
- 324 15. Regules, J. A. *et al.* A Recombinant Vesicular Stomatitis Virus Ebola Vaccine. *N Engl J Med*  
325 **376**, 330–341 (2017).
- 326 16. World Health Organization. Preliminary results on the efficacy of rVSV-ZEBOV-GP Ebola  
327 vaccine using the ring vaccination strategy in the control of an Ebola outbreak in the  
328 Democratic Republic of the Congo: an example of integration of research into epidemic  
329 response. (2019).
- 330 17. Wells, C. *et al.* Harnessing Case Isolation and Ring Vaccination to Control Ebola. *PLoS Negl*  
331 *Trop Dis* **9**, (2015).
- 332 18. Hong, S. & Collins, A. Societal Responses to Familiar Versus Unfamiliar Risk: Comparisons of  
333 Influenza and SARS in Korea. *Risk Analysis* **26**, 1247–1257 (2006).
- 334 19. Kerstiëns, B. & Matthys, F. Interventions to Control Virus Transmission during an Outbreak  
335 of Ebola Hemorrhagic Fever: Experience from Kikwit, Democratic Republic of the Congo,  
336 1995. *J Infect Dis.* **179**, S263–S267 (1999).
- 337 20. Ngwa, G. A. & Teboh-Ewungkem, M. I. A Mathematical Model with Quarantine States for  
338 the Dynamics of Ebola Virus Disease in Human Populations. *Comput Math Methods Med*  
339 **2016**, (2016).
- 340 21. Hsieh, Y.-H. *et al.* Impact of quarantine on the 2003 SARS outbreak: A retrospective  
341 modeling study. *Journal of Theoretical Biology* **244**, 729–736 (2007).
- 342 22. Bauch, C. T. & Galvani, A. P. Social Factors in Epidemiology. *Science* **342**, 47–49 (2013).
- 343 23. Chowell, G. & Nishiura, H. Transmission dynamics and control of Ebola virus disease (EVD): a  
344 review. *BMC Medicine* **12**, 196 (2014).
- 345 24. Wallinga, J. & Teunis, P. Different Epidemic Curves for Severe Acute Respiratory Syndrome  
346 Reveal Similar Impacts of Control Measures. *Am. J. Epidemiol.* **160**, 509–516 (2004).
- 347 25. Riley, S. *et al.* Transmission Dynamics of the Etiological Agent of SARS in Hong Kong: Impact  
348 of Public Health Interventions. *Science* **300**, 1961–1966 (2003).



- 349 26. Cauchemez, S. *et al.* Real-time Estimates in Early Detection of SARS. *Emerg Infect Dis* **12**,  
350 110–113 (2006).
- 351 27. Assiri, A. *et al.* Hospital Outbreak of Middle East Respiratory Syndrome Coronavirus. *N Engl J*  
352 *Med* **369**, 407–416 (2013).
- 353 28. Cowling, B. J. *et al.* Preliminary epidemiologic assessment of MERS-CoV outbreak in South  
354 Korea, May–June 2015. *Euro Surveill* **20**, (2015).
- 355 29. Bland, J. M. & Altman, D. G. Multiple significance tests: the Bonferroni method. *BMJ* **310**,  
356 170 (1995).
- 357 30. R Development Core Team. *R: A Language and Environment for Statistical Computing*. (The  
358 R Foundation for Statistical Computing, 2011).
- 359 31. Barbisch, D., Koenig, K. L. & Shih, F.-Y. Is There a Case for Quarantine? Perspectives from  
360 SARS to Ebola. *Disaster Medicine and Public Health Preparedness* **9**, 547–553 (2015).
- 361
